# Supplementary material for: Towards understanding global patterns of antimicrobial use and resistance in neonatal sepsis: insights from the NeoAMR network
Source: PubMed Central journal article supplement — Arch Dis Child. 2019 Aug 24;105(1):26–31. doi: 10.1136/archdischild-2019-316816 (PMC6951234; doi:10.1136/archdischild-2019-316816), 2019-08-24
Supplement: archdischild-2019-316816supp001.pdf [file archdischild-2019-316816supp001.pdf]

## Appendix 1 : Empirical antibiotic regimens for NeoAMR centres

| Country      | City           | Empirical therapy for EOS                            | Empirical therapy for LOS                            | Empirical therapy for meningitis                               |
|--------------|----------------|------------------------------------------------------|------------------------------------------------------|----------------------------------------------------------------|
| Bangladesh   | Chittagong     | amikacin and ceftazidime                             | amikacin and ceftazidime                             | ceftazidime                                                    |
| Bangladesh   | Dhaka          | amikacin and ceftazidime                             | amikacin and ceftazidime                             | ceftazidime                                                    |
| Bangladesh   | Mirzapur       | amikacin and ceftazidime                             | amikacin and ceftazidime                             | ceftazidime and ceftriaxone                                    |
| Brazil       | Rio De Janeiro | ampicillin and gentamicin                            | oxacillin and piperacillin/tazobactam                | ampicillin and cefepime                                        |
| Brazil       | Sao Paulo      | benzylpenicillin and gentamicin                      | amikacin and oxacillin                               | ampicillin and cefotaxime                                      |
| Brazil       | São Paulo      | ampicillin and gentamicin                            | amikacin and oxacillin                               | amikacin and oxacillin                                         |
| Cambodia     | Siem Reap      | ampicillin and gentamicin                            | ampicillin and gentamicin                            | ampicillin and ceftriaxone                                     |
| China        | Beijing        | amoxicillin/clavulanic acid and ceftazidime          | amoxicillin/clavulanic acid and ceftazidime          | benzylpenicillin and ceftriaxone                               |
| China        | Beijing        | cefepime and meropenem                               | meropenem and vancomycin                             | meropenem and vancomycin                                       |
| China        | Guangzhou      | benzylpenicillin and ceftazidime                     | benzylpenicillin and ceftazidime                     | benzylpenicillin and ceftazidime                               |
| China        | Shenzhen       | ceftazidime and ceftriaxone                          | meropenem                                            | ceftriaxone                                                    |
| China        | Shenzhen       | benzylpenicillin and ceftazidime                     | cefoperazone/sulbactam and meropenem                 | amikacin and vancomycin                                        |
| China        | Tianjin        | benzylpenicillin and ceftriaxone                     | benzylpenicillin and ceftriaxone                     | benzylpenicillin and ceftriaxone                               |
| Colombia     | Cali           | amikacin and ampicillin                              | cefotaxime and vancomycin                            | amikacin and cefepime                                          |
| Greece       | Athens         | ampicillin and gentamicin                            | meropenem and vancomycin                             | ampicillin and cefotaxime                                      |
| Greece       | Thessaloniki   | ampicillin and gentamicin                            | cefepime and vancomycin                              | meropenem and vancomycin                                       |
| India        | Andhra Pradesh | amikacin and ampicillin                              | amikacin and ciprofloxacin                           | amikacin and cefotaxime                                        |
| India        | Chandrigar     | amikacin and ciprofloxacin                           | amikacin and ciprofloxacin                           | meropenem                                                      |
| India        | Chennai        | amikacin and ciprofloxacin                           | amikacin and piperacillin/tazobactam                 | meropenem and vancomycin                                       |
| India        | Hyderabad      | amikacin                                             | amikacin                                             | cefotaxime                                                     |
| India        | Jamnagar       | amikacin and ampicillin                              | cefotaxime and vancomycin                            | cefotaxime and vancomycin                                      |
| India        | Kochi          | amikacin and ampicillin                              | amikacin                                             | amikacin and meropenem                                         |
| India        | Manipal        | amikacin and ampicillin                              | amikacin and cefotaxime                              | amikacin and cefotaxime                                        |
| India        | New Delhi      | amikacin and piperacillin/tazobactam                 | amikacin and piperacillin/tazobactam                 | amikacin and meropenem                                         |
| India        | New Delhi      | amikacin and ciprofloxacin                           | amikacin and cloxacillin                             | amikacin and vancomycin                                        |
| Nigeria      | Kano           | amoxicillin/beta lactamase inhibitor and ceftazidime | amoxicillin/beta lactamase inhibitor and ceftazidime | amoxicillin/beta lactamase inhibitor and cefotaxime            |
| South Africa | Cape Town      | benzylpenicillin and gentamicin                      | amikacin and piperacillin/tazobactam                 | ampicillin and cefotaxime                                      |
| South Africa | Johannesburg   | ampicillin and gentamicin                            | meropenem and vancomycin                             | ampicillin and cefotaxime (EOS)/meropenem and vancomycin (LOS) |
| South Africa | Johannesburg   | ampicillin and gentamicin                            | amikacin and piperacillin/tazobactam                 | ampicillin and cefotaxime                                      |
| South Africa | Johannesburg   | benzylpenicillin and gentamicin                      | meropenem and vancomycin                             | cefotaxime                                                     |
| Thailand     | Bangkok        | ampicillin and gentamicin                            | ampicillin and cefotaxime                            | ampicillin and cefotaxime                                      |
| Thailand     | Bangkok        | ampicillin and gentamicin                            | gentamicin and vancomycin                            | ampicillin and cefotaxime                                      |
| Thailand     | Bangkok        | ampicillin and gentamicin                            | cefotaxime and cloxacillin                           | ampicillin and cefotaxime                                      |
| Thailand     | Chiang Rai     | ampicillin and gentamicin                            | amikacin and ceftazidime                             | meropenem                                                      |
| Thailand     | Khon Kaen      | ampicillin and gentamicin                            | amikacin and cefotaxime                              | ampicillin and cefotaxime                                      |
| Thailand     | Phayao         | ampicillin and gentamicin                            | ampicillin and gentamicin                            | ampicillin and gentamicin                                      |
| Uganda       | Kampala        | ampicillin and gentamicin                            | ampicillin and gentamicin                            | ceftriaxone and gentamicin                                     |
| Vietnam      | Hanoi          | ampicillin and gentamicin                            | cefotaxime and vancomycin                            | ampicillin, amikacin, ceftazidime                              |
